# Supplementary material
Source: PubMed Central journal article supplement (PMC4325423)

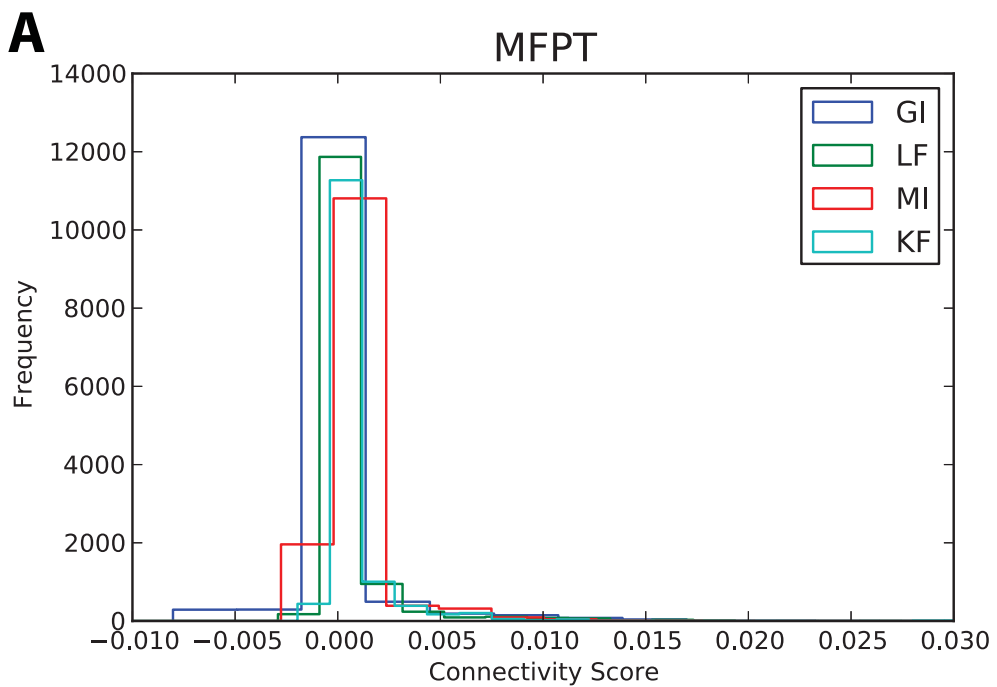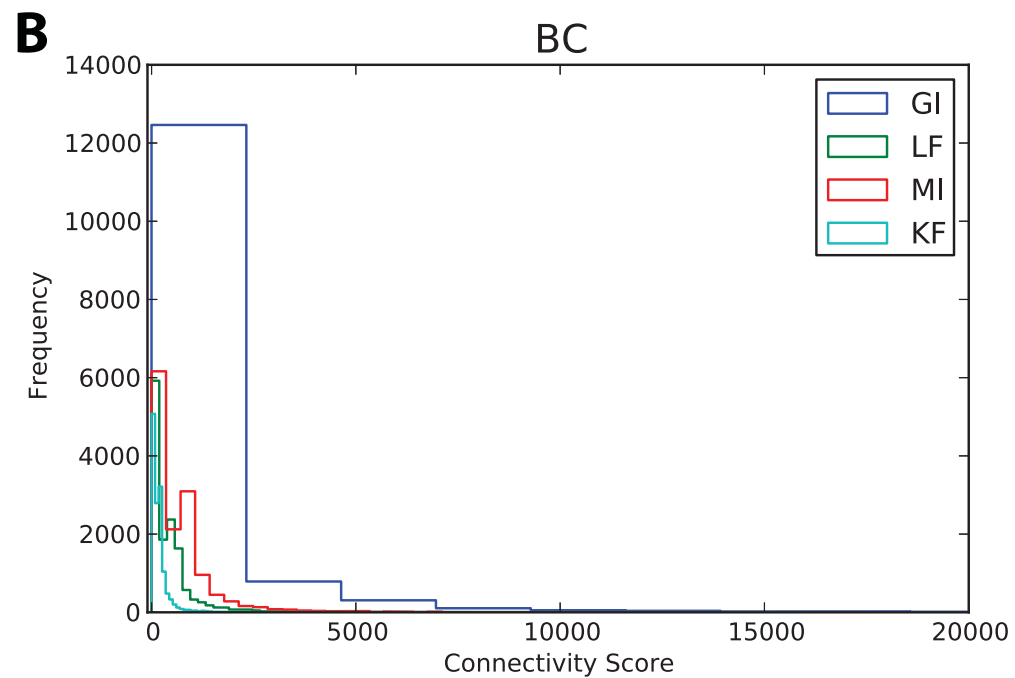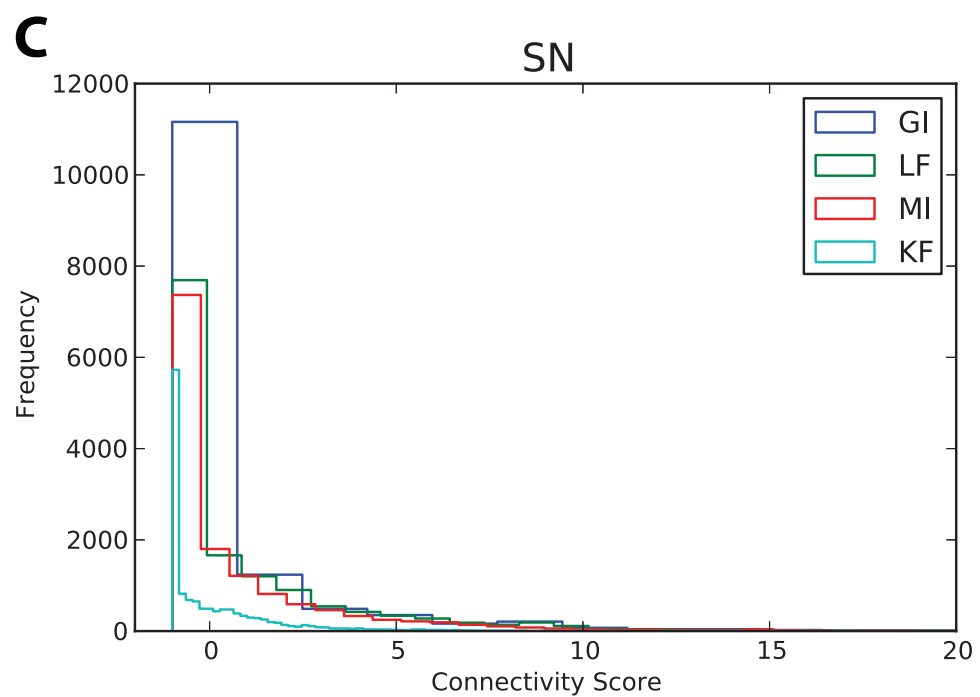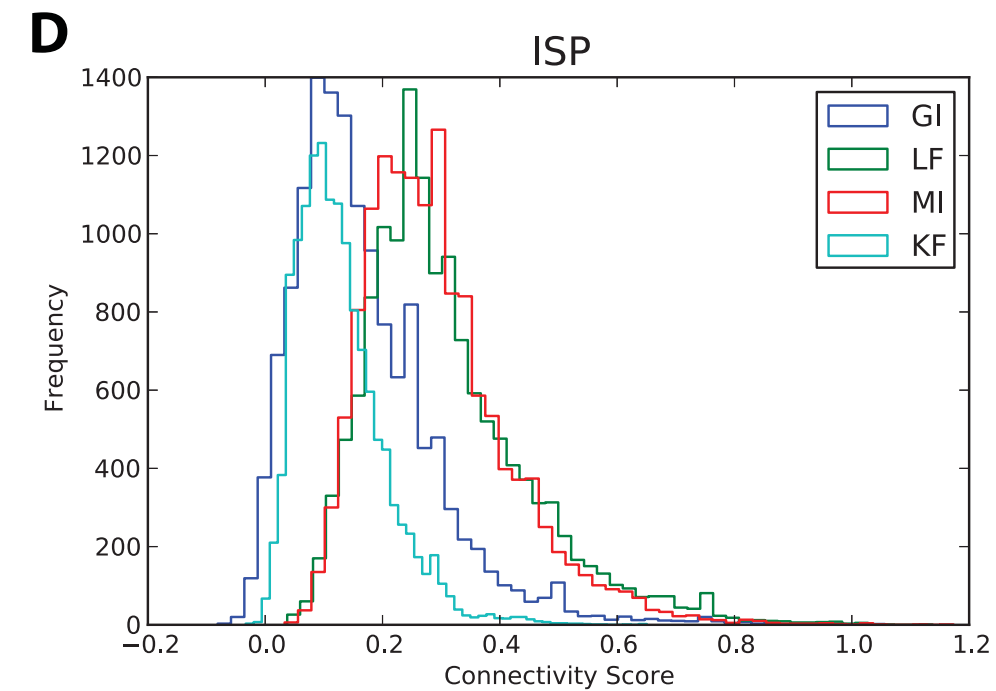

Supplement: NIHMS631704-supplement-2.pdf [file NIHMS631704-supplement-2.pdf]

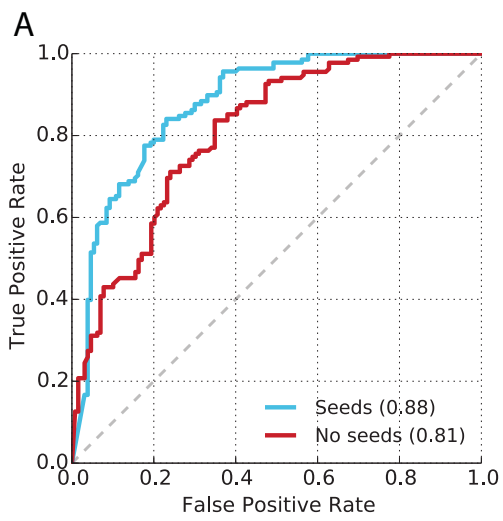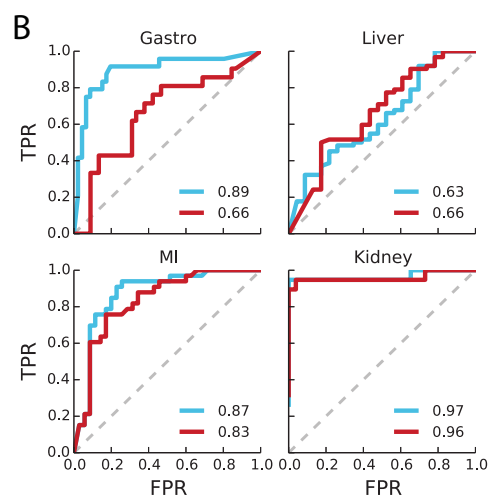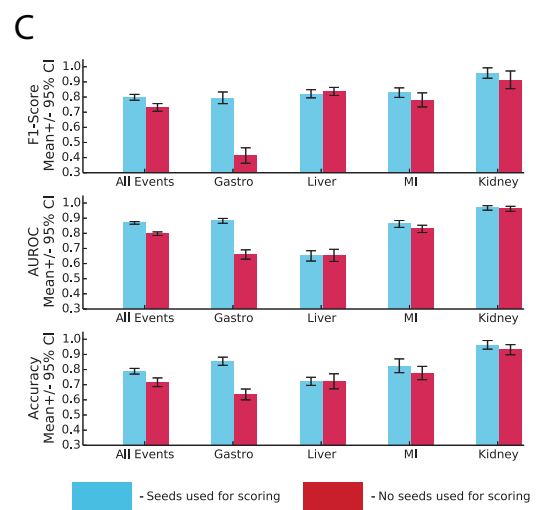

Supplement: NIHMS631704-supplement-3.pdf [file NIHMS631704-supplement-3.pdf]

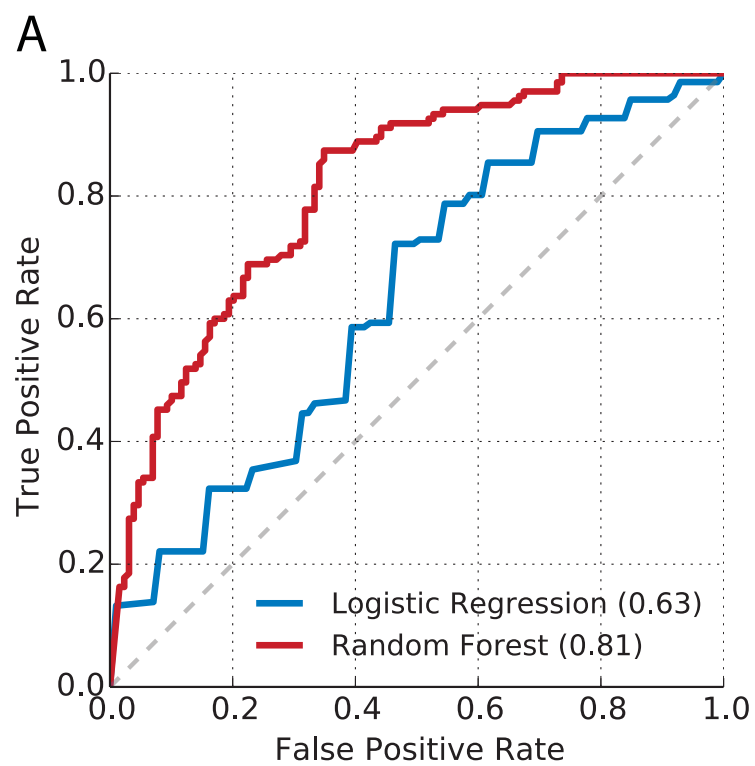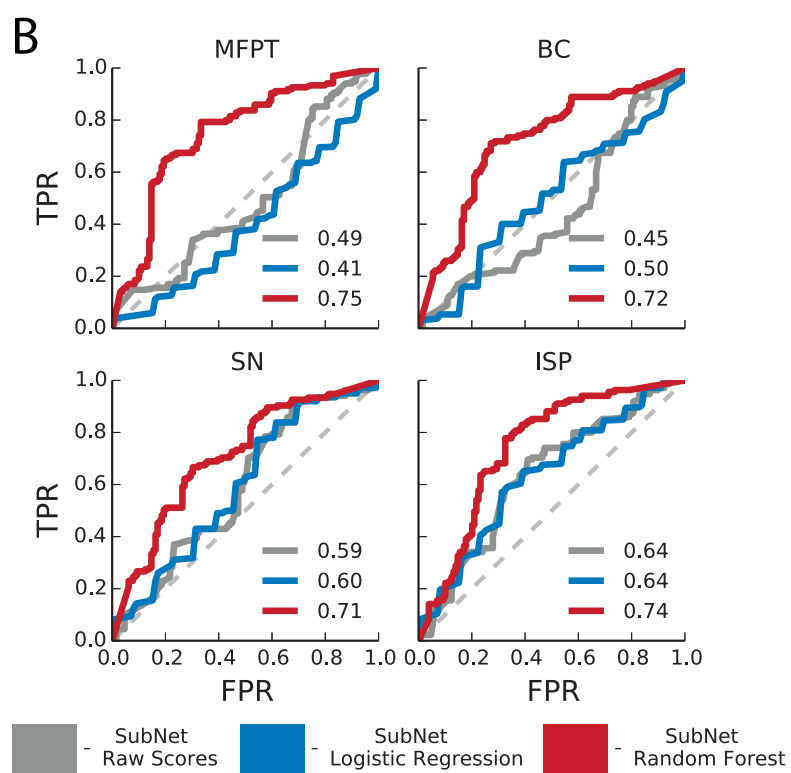

Supplement: NIHMS631704-supplement-4.pdf [file NIHMS631704-supplement-4.pdf]

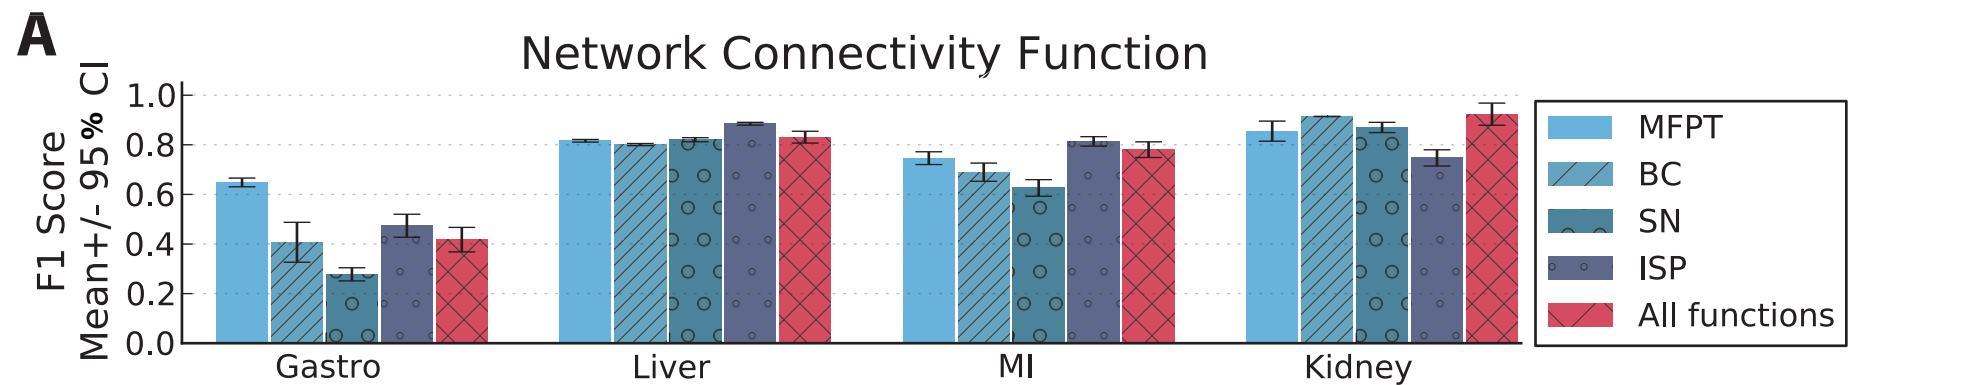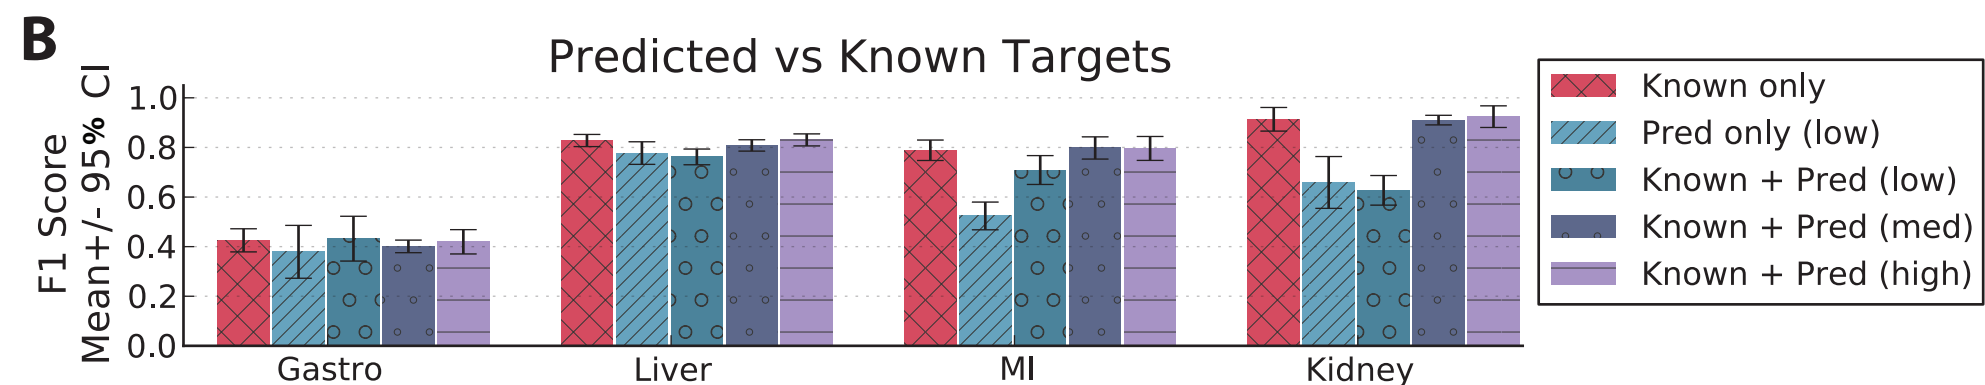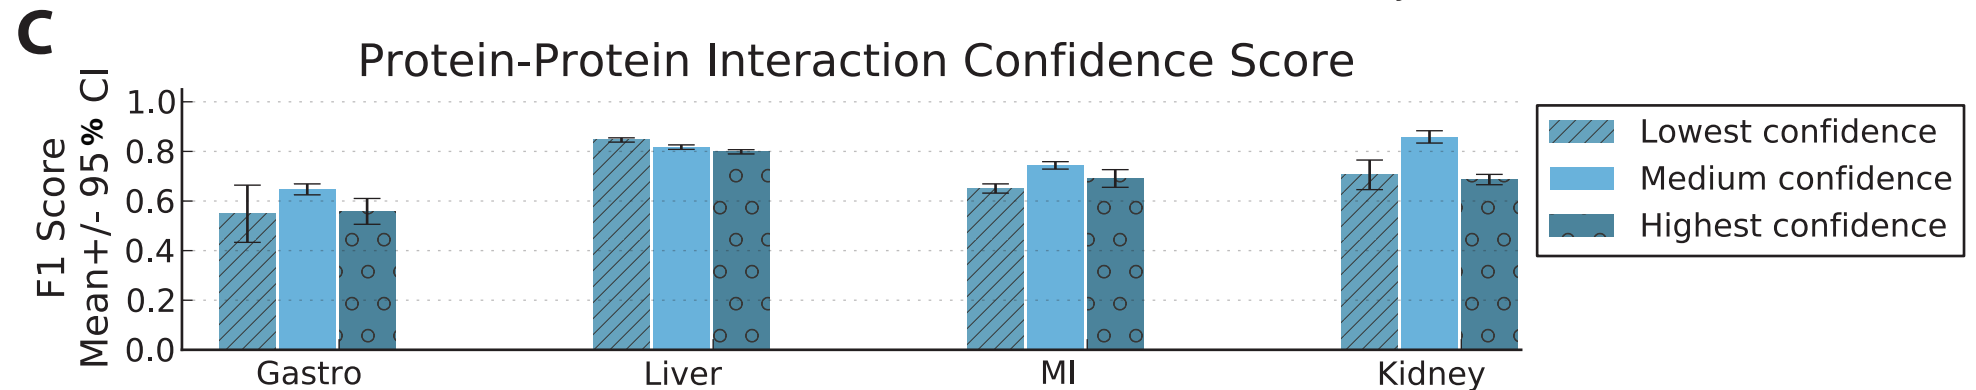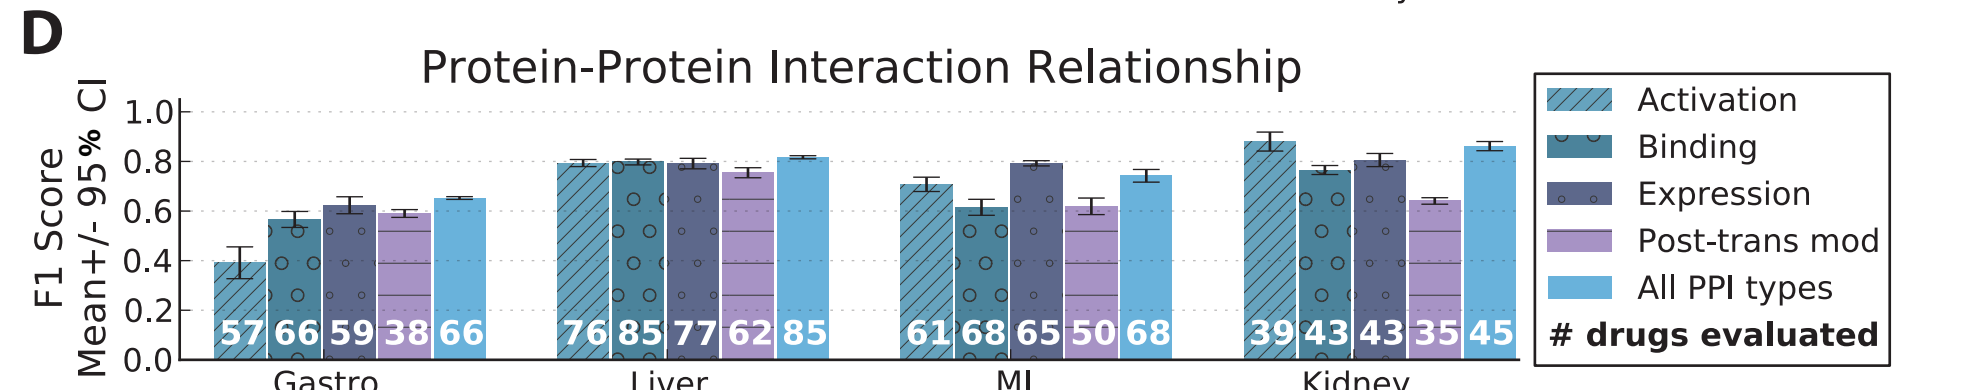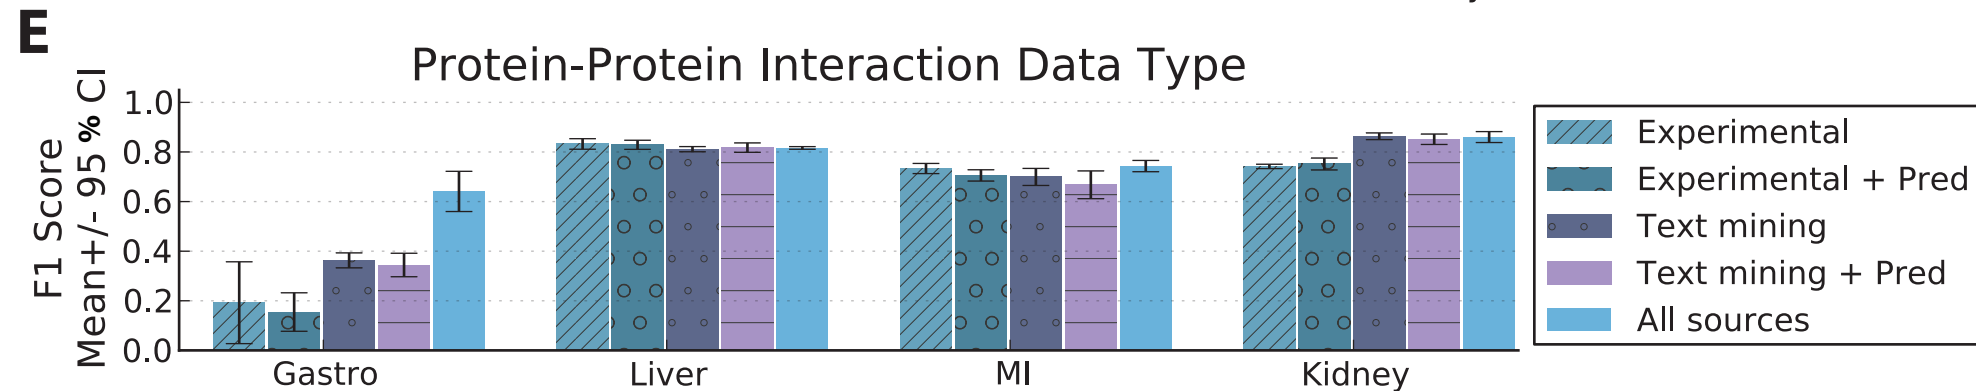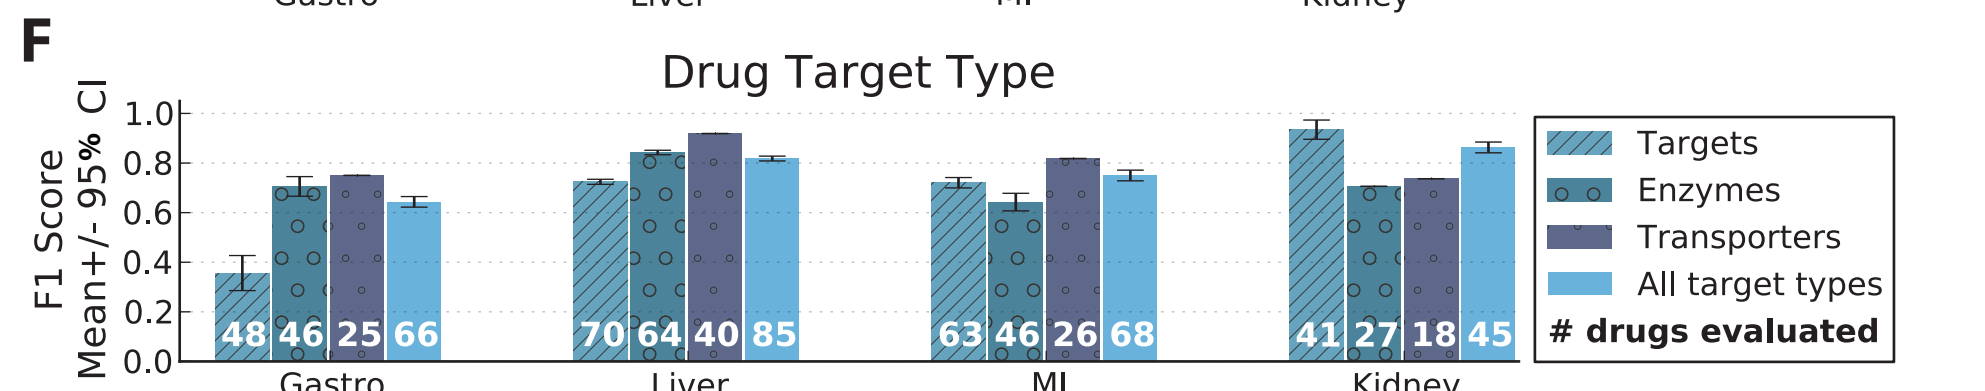

Supplement: NIHMS631704-supplement-5.pdf [file NIHMS631704-supplement-5.pdf]

# Gastrointestinal bleeding

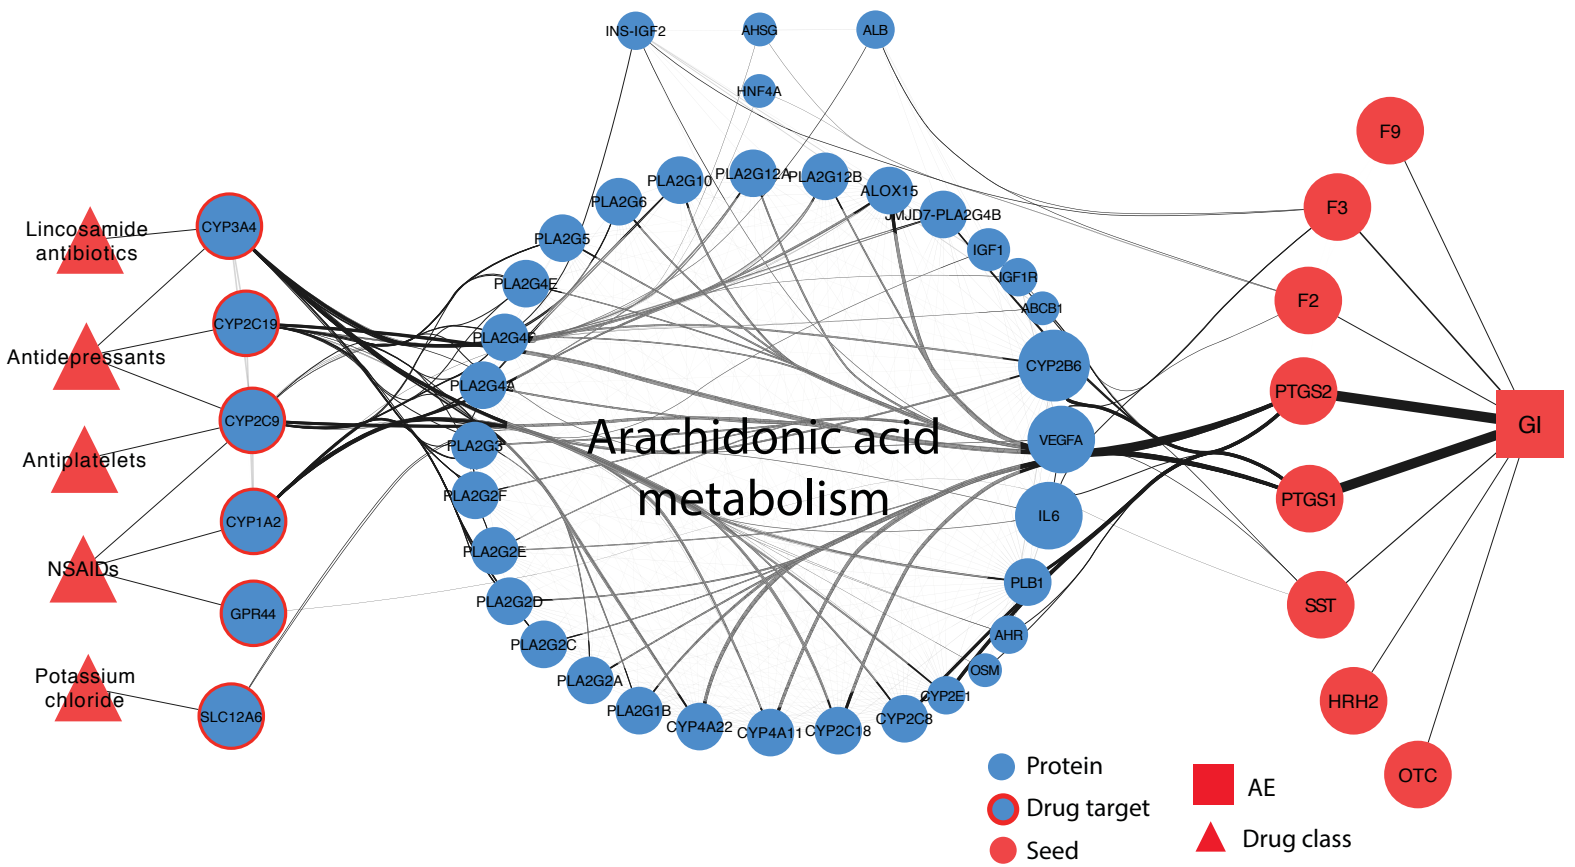

Supplement: NIHMS631704-supplement-6.pdf [file NIHMS631704-supplement-6.pdf]

# Acute liver failure

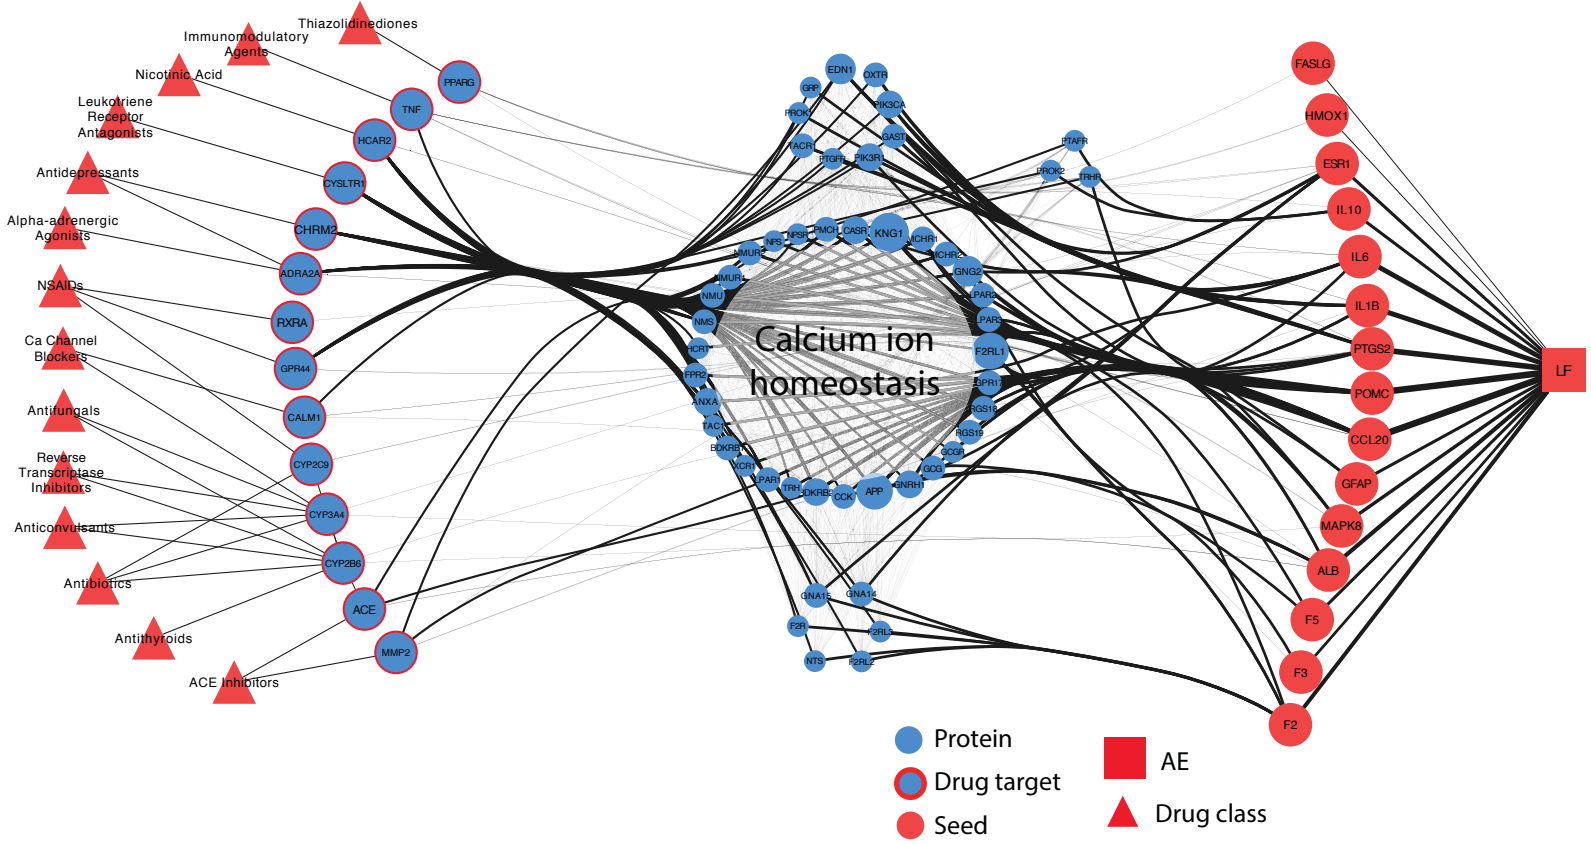

Supplement: NIHMS631704-supplement-7.pdf [file NIHMS631704-supplement-7.pdf]

# Acute kidney failure

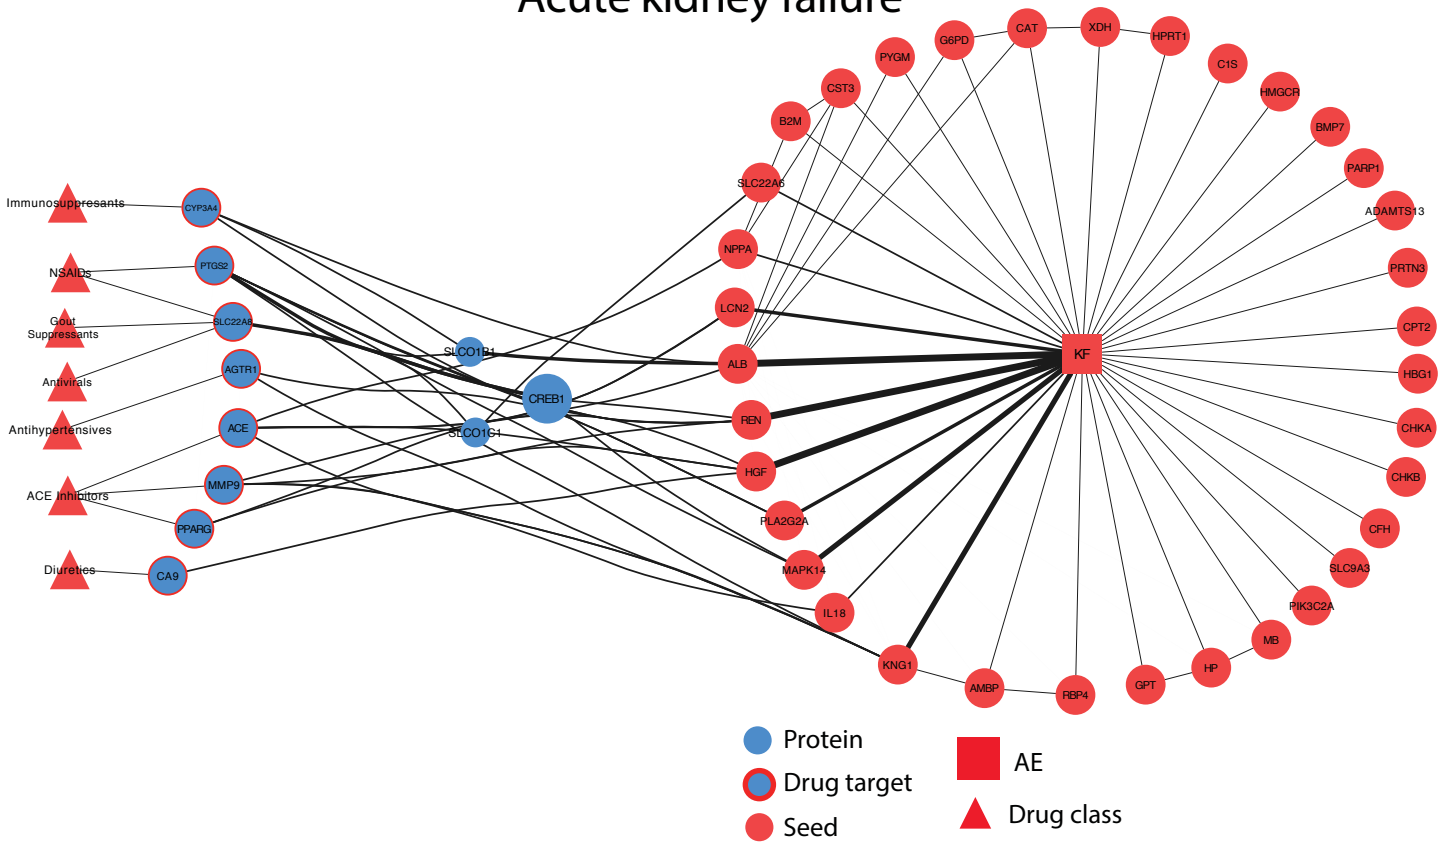

Supplement: NIHMS631704-supplement-8.pdf [file NIHMS631704-supplement-8.pdf]
